# Supplementary material
Source: PubMed Central journal article supplement (PMC7378869)
Supplement: jamaophthalmol-e202457-s001.pdf [file jamaophthalmol-e202457-s001.pdf]

## Supplementary Online Content

Roberts PK, Vogl W-D, Gerendas BS, et al. Quantification of fluid resolution and visual acuity gain in patients with diabetic macular edema using deep learning: a post hoc analysis of a randomized clinical trial. *JAMA Ophthalmol*. Published online July 23, 2020. doi:10.1001/jamaophthalmol.2020.2457

**eFigure.** Trajectory of Intraretinal and Subretinal Fluid Volumes

This supplementary material has been provided by the authors to give readers additional information about their work.

**eFigure.** Trajectory of Intraretinal and Subretinal Fluid Volumes

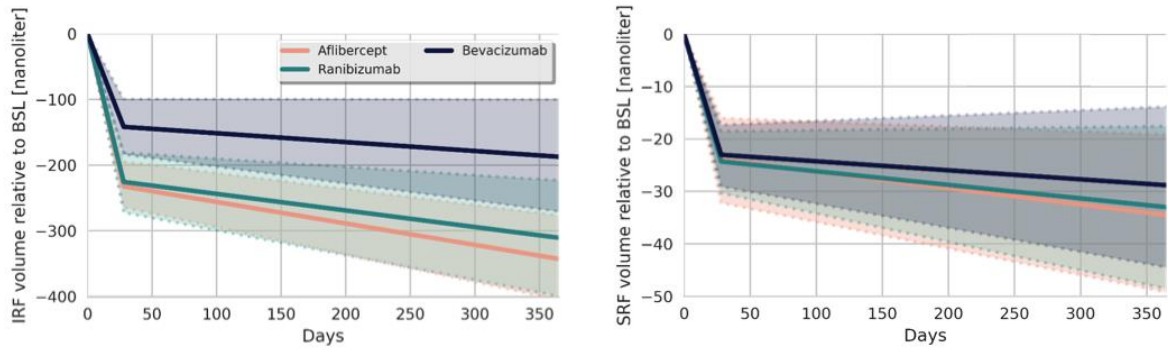

**eFigure.** Trajectory of intraretinal fluid (left) and subretinal fluid (SRF) relative to baseline (starting point) for each treatment group (aflibercept, ranibizumab, bevacizumab).
